# Supplementary material for: Type 2 diabetes and risk of diverticular disease: a Danish cohort study
Source: HighWire-hosted journal article supplement (doi:10.1136/bmjopen-2021-059852), 2022-02-01
Supplement: bmjopen-2021-059852supp001_data_supplement.pdf [file bmjopen-2021-059852supp001_data_supplement.pdf]

## SUPPLEMENTAL MATERIAL

### **Type 2 diabetes and risk of diverticular disease: a Danish cohort study**

#### **Authors:**

Felix Wittström, MD;<sup>1</sup>, Nils Skajaa, MSc;<sup>1,2</sup>, Kasper Bonnesen, MD;<sup>1</sup>, Lars Pedersen, PhD;<sup>1</sup>,  
Ola Ekholm, MSc;<sup>2</sup>, Lisa Strate, MD;<sup>3</sup>, Rune Erichsen, PhD;<sup>1</sup>, Henrik Toft Sørensen, DMSc<sup>1</sup>

#### **Author affiliations:**

<sup>1</sup>Department of Clinical Epidemiology, Department of Clinical Medicine, Aarhus University,  
Aarhus University Hospital, Aarhus, Denmark

<sup>2</sup>National Institute of Public Health, University of Southern Denmark, Copenhagen, Denmark

<sup>3</sup>Division of Gastroenterology, Department of Medicine, Harborview Medical Center,  
University of Washington Medical School, Seattle, WA, USA

**Supplemental Material 1. Extended type 2 diabetes cohort**

For this analysis, any type of diabetes was defined by at least one of the following three criteria: 1) self-reported diabetes diagnosis in the Danish National Health Survey (yes/no), 2) a hospital-based discharge diagnosis of diabetes registered in the Danish National Patient Registry before the index date, or 3) a redeemed prescription for a glucose-lowering drug registered in the Danish National Health Service Prescription Database before the index date. We then defined and excluded patients with type 1 diabetes as those with a hospital-based diabetes diagnosis or a redeemed prescription for insulin before 30 years of age and with no redeemed prescription of oral glucose-lowering medications before the index date.

| <b>Supplemental Table 1.</b> <i>International Classification of Diseases (ICD), Nordic Medico-Statistical Committee System (NOMESCO), and Anatomical Therapeutic Chemical Classification System (ATC) codes used in the study.</i> |                                                                                                                                                                                                                                                                                                                                                                                                                 |                                                                                                                                                                                                                 |
|------------------------------------------------------------------------------------------------------------------------------------------------------------------------------------------------------------------------------------|-----------------------------------------------------------------------------------------------------------------------------------------------------------------------------------------------------------------------------------------------------------------------------------------------------------------------------------------------------------------------------------------------------------------|-----------------------------------------------------------------------------------------------------------------------------------------------------------------------------------------------------------------|
|                                                                                                                                                                                                                                    | <b>ICD-10/NOMESCO</b>                                                                                                                                                                                                                                                                                                                                                                                           | <b>ATC</b>                                                                                                                                                                                                      |
| <b>Exposure</b>                                                                                                                                                                                                                    |                                                                                                                                                                                                                                                                                                                                                                                                                 |                                                                                                                                                                                                                 |
| Type 2 Diabetes Mellitus                                                                                                                                                                                                           | E10-E14<br>O24 (except O24.4)<br>G63.2, H36.0, N08.3<br><br><b>Type 2 diabetes mellitus:</b> first ICD-10 code or glucose-lowering medication (A10) at or above 40 years of age.<br><br><b>Subclassifications:</b><br>Type 1 diabetes mellitus: first ICD-10 code before 30 years of age and treated with insulin (A10A), in addition no history of oral glucose-lowering medications (A10B) before index date. | Insulin: A10A, and oral glucose-lowering medications: A10B                                                                                                                                                      |
| <b>Outcome</b>                                                                                                                                                                                                                     |                                                                                                                                                                                                                                                                                                                                                                                                                 |                                                                                                                                                                                                                 |
| Diverticular Disease                                                                                                                                                                                                               | K57.2–K57.9<br>(also used for exclusion)<br><br><b>Subclassifications:</b><br><br>1) Surgically treated: ICD-10 code and a KJF, KJG, or KJAH01 surgery code (NOMESCO) recorded within 30 days after ICD-10 code.<br><br>2) Acute admission to inpatient care: ICD-10 code as an acute inpatient diagnosis                                                                                                       |                                                                                                                                                                                                                 |
| <b>Exclusion criteria</b>                                                                                                                                                                                                          |                                                                                                                                                                                                                                                                                                                                                                                                                 |                                                                                                                                                                                                                 |
| Inflammatory Bowel Disease                                                                                                                                                                                                         | K50-K51                                                                                                                                                                                                                                                                                                                                                                                                         |                                                                                                                                                                                                                 |
| Colorectal Cancer                                                                                                                                                                                                                  | C18, C20                                                                                                                                                                                                                                                                                                                                                                                                        |                                                                                                                                                                                                                 |
| <b>Colonoscopy definition</b>                                                                                                                                                                                                      |                                                                                                                                                                                                                                                                                                                                                                                                                 |                                                                                                                                                                                                                 |
| Colonoscopy or sigmoidoscopy (with or without biopsy)                                                                                                                                                                              | KUJF32, KUJF35, KUJF42, KUJF45                                                                                                                                                                                                                                                                                                                                                                                  |                                                                                                                                                                                                                 |
| <b>Comorbidities</b>                                                                                                                                                                                                               |                                                                                                                                                                                                                                                                                                                                                                                                                 |                                                                                                                                                                                                                 |
| Myocardial Infarction                                                                                                                                                                                                              | I21                                                                                                                                                                                                                                                                                                                                                                                                             |                                                                                                                                                                                                                 |
| Stroke                                                                                                                                                                                                                             | I60, I61, I63, I64                                                                                                                                                                                                                                                                                                                                                                                              |                                                                                                                                                                                                                 |
| Heart Failure                                                                                                                                                                                                                      | I50, I11.0, I13.0, I13.2, I42.0, I42.6, I42.7, I42.8, I42.9                                                                                                                                                                                                                                                                                                                                                     |                                                                                                                                                                                                                 |
| Hypertension                                                                                                                                                                                                                       | I10-I15                                                                                                                                                                                                                                                                                                                                                                                                         | Anti-hypertensive drugs: C02, vasodilators: C04, $\beta$ -blockers: C07, calcium channel blockers: C08, renin-angiotensin system inhibitors: C09, and diuretics: C03 ( $\geq 2$ prescriptions in the last year) |
| Atrial Fibrillation                                                                                                                                                                                                                | I48                                                                                                                                                                                                                                                                                                                                                                                                             |                                                                                                                                                                                                                 |
| <b>Comedications</b>                                                                                                                                                                                                               |                                                                                                                                                                                                                                                                                                                                                                                                                 |                                                                                                                                                                                                                 |
| Non-Steroidal Anti-Inflammatory Drugs                                                                                                                                                                                              |                                                                                                                                                                                                                                                                                                                                                                                                                 | M01A ( $\geq 4$ in the last year)                                                                                                                                                                               |
| Antiplatelets                                                                                                                                                                                                                      |                                                                                                                                                                                                                                                                                                                                                                                                                 | N02BA01, B01AC, ( $\geq 2$ in the last year)                                                                                                                                                                    |

|                                                                           |  |                                           |
|---------------------------------------------------------------------------|--|-------------------------------------------|
| Angiotensin-Converting Enzyme inhibitors /Angiotensin 2 Receptor Blockers |  | C09AA, C09CA ( $\geq 2$ in the last year) |
| Beta-Blockers                                                             |  | C07 ( $\geq 2$ in the last year)          |
| Calcium Channel Blockers                                                  |  | C08 ( $\geq 2$ in the last year)          |
| Diuretics                                                                 |  | C03 ( $\geq 2$ in the last year)          |
| Statins                                                                   |  | C10AA ( $\geq 2$ in the last year)        |

**Supplemental Table 2.** Risk of diverticular disease in patients with and without diabetes among the 2010 and 2013 DNHS respondents  $\geq 40$  years of age, overall and stratified by duration of diabetes.

|                                   | Events | Incidence rates<br>per 1,000<br>person-years<br>(95% CI) | Hazard ratios (95% CI) |                  |
|-----------------------------------|--------|----------------------------------------------------------|------------------------|------------------|
|                                   |        |                                                          | Crude*                 | Adjusted‡        |
| No diabetes                       | 7,825  | 0.54 (0.53-0.55)                                         | Reference              | Reference        |
| Type 2 diabetes, overall          | 702    | 0.76 (0.70-0.82)                                         | 1.08 (1.00-1.16)       | 0.88 (0.80-0.96) |
| Short duration (< 2.5 years)      | 199    | 0.80 (0.70-0.92)                                         | 1.19 (1.04-1.37)       | 1.05 (0.90-1.23) |
| Moderate duration (2.5-4.9 years) | 164    | 0.82 (0.70-0.95)                                         | 1.17 (1.00-1.37)       | 0.94 (0.78-1.12) |
| Long duration ( $\geq 5$ years)   | 339    | 0.71 (0.64-0.79)                                         | 0.98 (0.88-1.09)       | 0.76 (0.67-0.87) |

DNHS, Danish National Health Survey; CI, Confidence Interval.

\*With age as underlying time variable. ‡Based on the crude model with additional adjustment for survey year, sex, body mass index, physical activity intensity, smoking behavior, diet, and education.
